# Supplementary material for: Ultrasound-induced piezoionic hydrogels with antibacterial and antioxidant properties for promoting infected diabetic wound healing
Source: Royal Society of Chemistry journal article supplement (doi:10.1039/d4tb02862g), 2025-01-01
Supplement: d4tb02862g1.pdf [file d4tb02862g1.pdf]

## Supporting Information

### Ultrasound-Induced Piezoionic Hydrogel with Antibacterial and Antioxidant Properties for Promoting Infected Diabetic Wound Healing

Chunhua Huang<sup>a,b,1</sup>, Xingxing Shi<sup>a,b,1</sup>, Binying Peng<sup>c,1</sup>, Jiapeng Song<sup>a,b</sup>, Hanwen Huang<sup>a,b</sup>, Bingna Zheng<sup>a,b</sup>, Youchen Tang<sup>a,b,\*</sup>, Zhaopeng Cai<sup>a,b,\*</sup>, Peng Wang<sup>a,b,\*</sup>

<sup>a</sup> *The Eighth Affiliated Hospital, Sun Yat-sen University, Shenzhen 518033, PR China*

<sup>b</sup> *Guangdong Provincial Clinical Research Center for Orthopedic Diseases, The Eighth Affiliated Hospital, Sun Yat-sen University, No. 3025 Shennan Road, Shenzhen, 518033, PR China.*

<sup>c</sup> *The Sixth Affiliated Hospital, Sun Yat-sen University, Guangzhou 510655, PR China*

\* Corresponding authors.

*E-mail addresses:* tangych7@mail.sysu.edu.cn (Y. Tang), caizhp3@mail.sysu.edu.cn (Z. Cai), wangp57@mail.sysu.edu.cn (P. Wang).

<sup>1</sup> These authors contributed equally to this work.

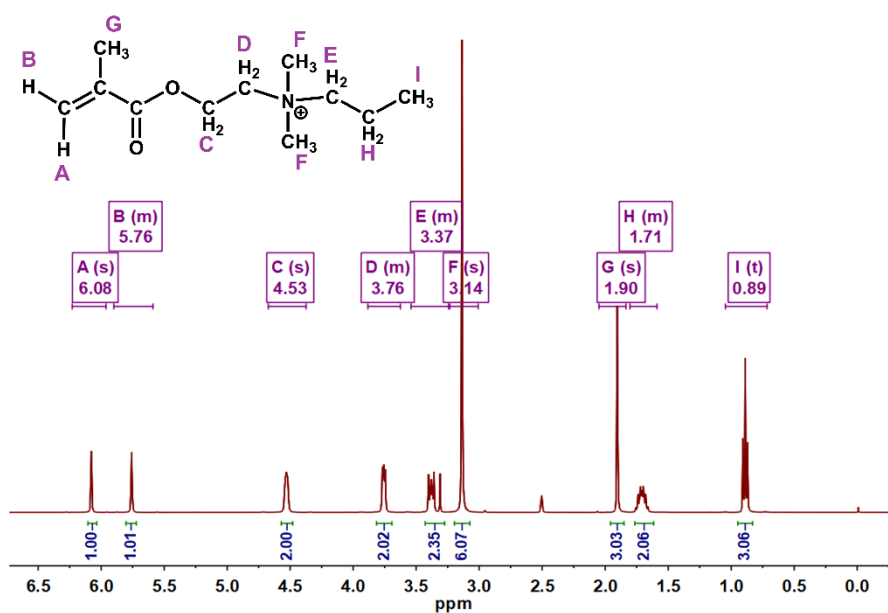

Fig. S1 <sup>1</sup>H NMR spectrum of DPAB.

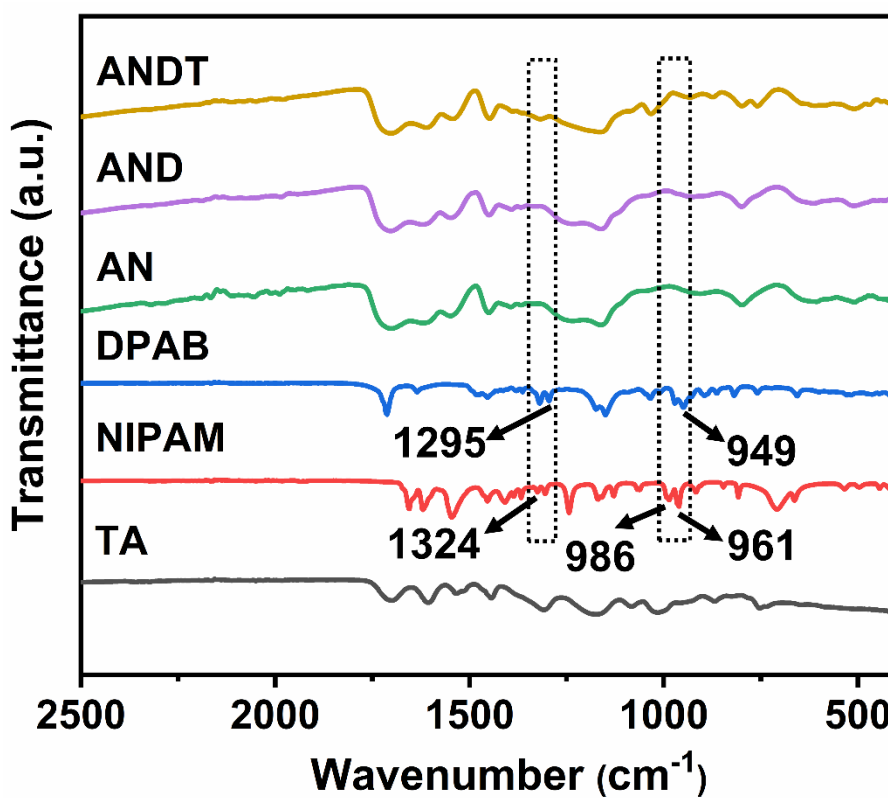

Fig. S2 FT-IR spectra of TA, NIPAM, DPAB, AN, AND, and ANDT.

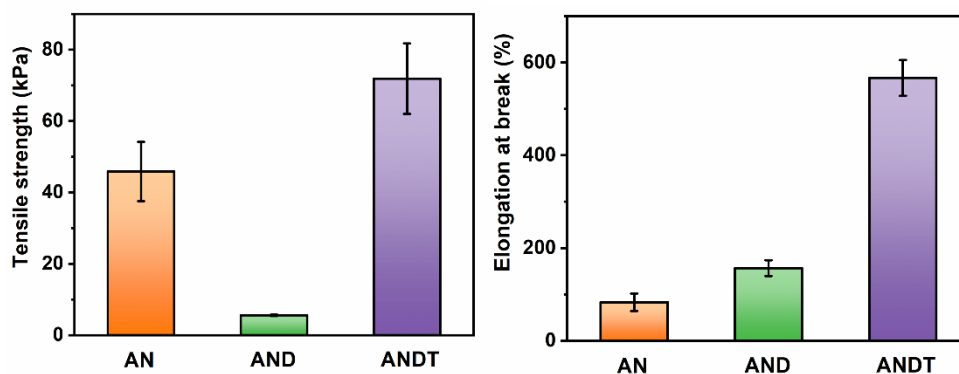

**Fig. S3** (a) Tensile strength and (b) elongation at break of AN, AND, and ANDT hydrogels. The error bars show a standard deviation,  $n = 3$ .

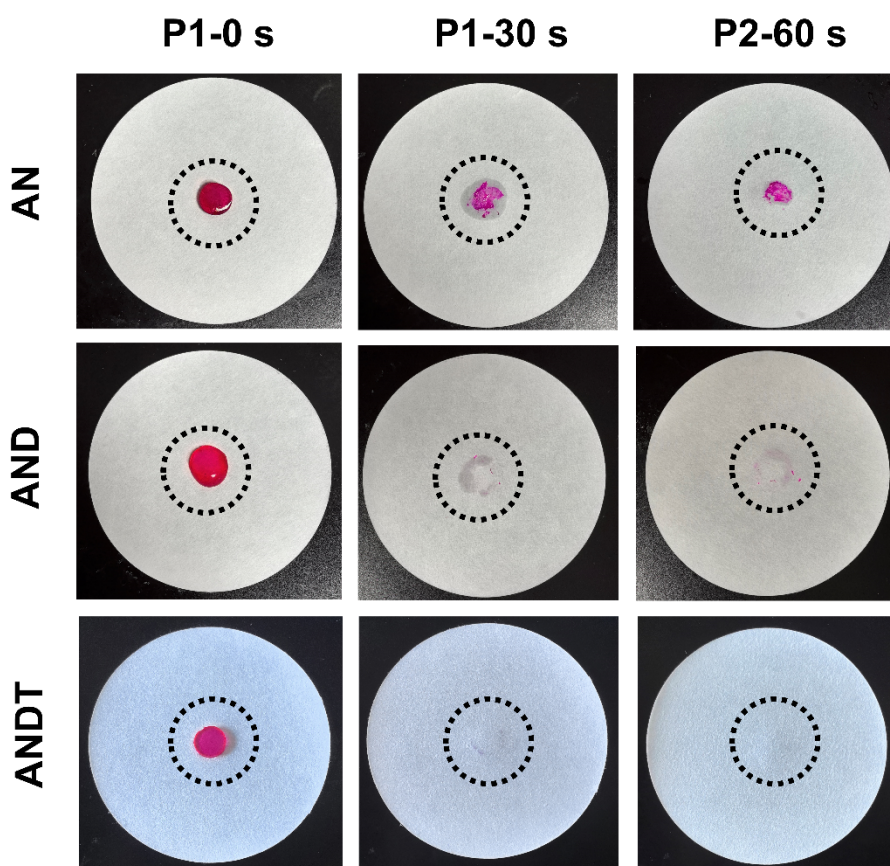

**Fig. S4** The anti-reflux performances of AN, AND, and ANDT hydrogels. P1-0 s: hydrogel samples were placed directly on the first filter paper; P1-30 s: hydrogel samples were placed on the first filter paper for 30 s and then were removed; P2-60 s: hydrogel samples were placed on the second filter paper for 60 s and then were removed. For easy observation, the hydrogels were saturated with rhodamine B solution.

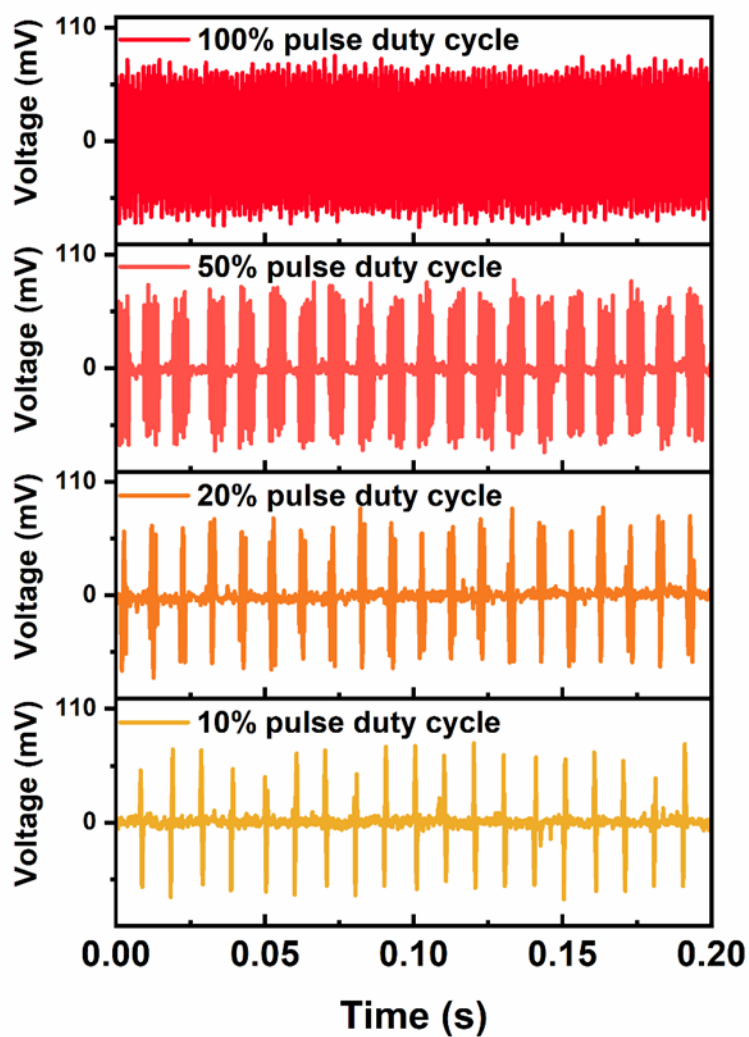

**Fig. S5** The output voltages of ANDT hydrogel under  $0.5 \text{ W/cm}^2$  with different pulse duty cycles.

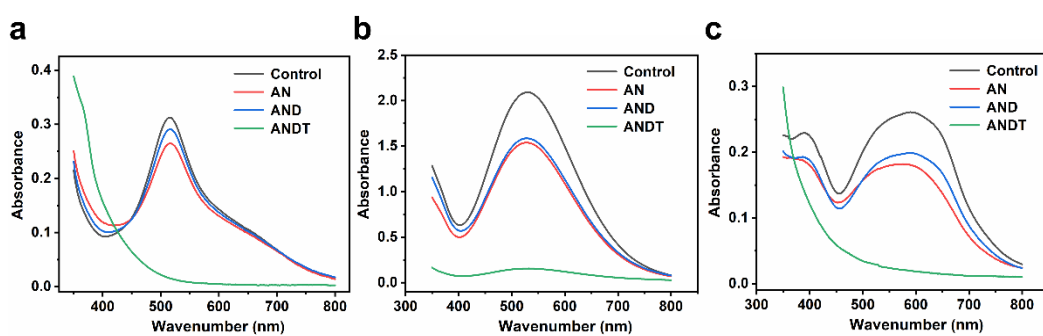

**Fig. S6** Absorbance curves of control, AN, AND, and ANDT groups for (a) DPPH, (b)  $\bullet\text{OH}$ , and (c)  $\text{O}_2\bullet^-$  scavenging assays.

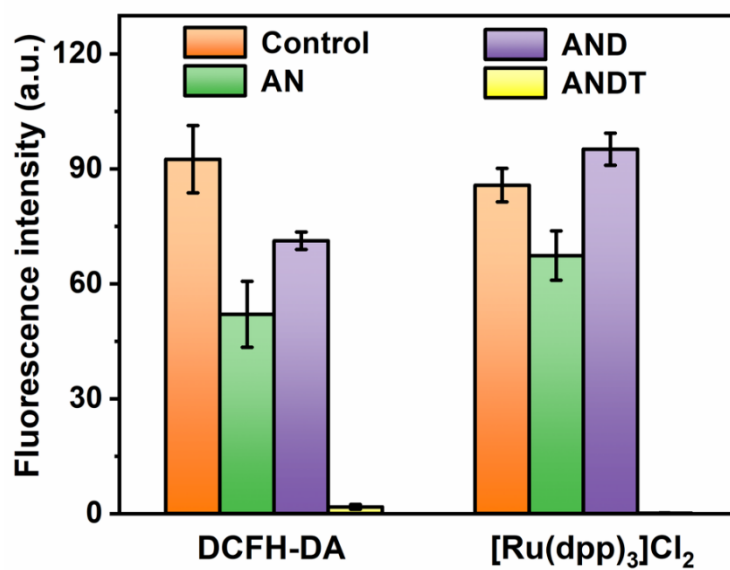

**Fig. S7** Quantitative assay of fluorescence intensity of the DCFH-DA probe and [Ru(dpp)<sub>3</sub>]Cl<sub>2</sub> indicator in L929 fibroblasts.

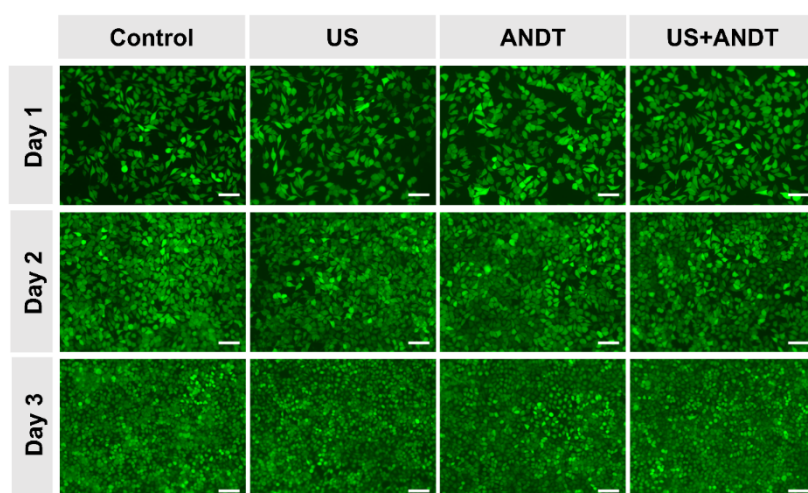

**Fig. S8** Live/dead staining of L929 fibroblasts (scale bars = 100 μm).

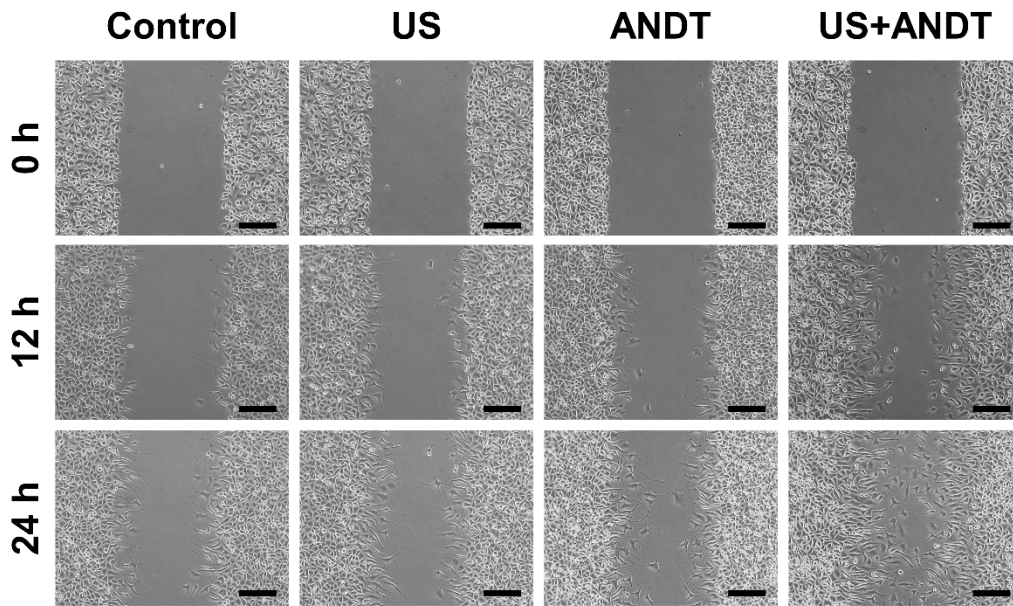

**Fig. S9** Cell migration images of fibroblasts for 0, 12 and 24 h in control, US, ANDT, US+ANDT groups (scale bars = 100  $\mu$ m).

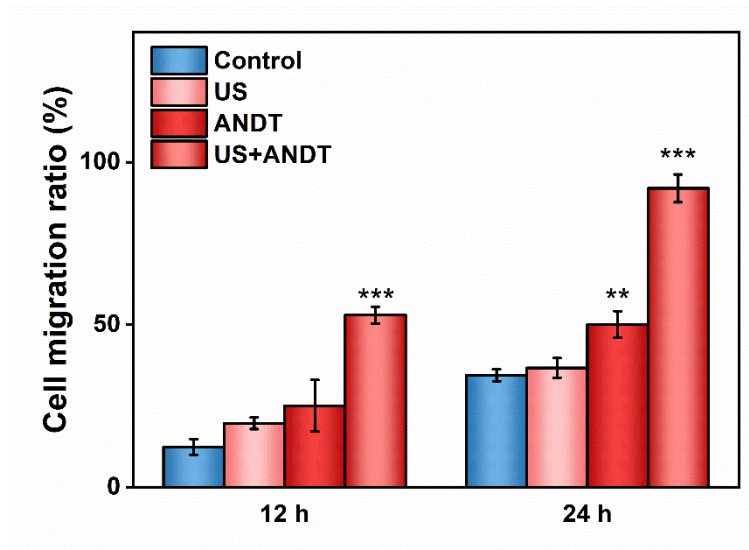

**Fig.S10** Quantitative analysis of cell migration.

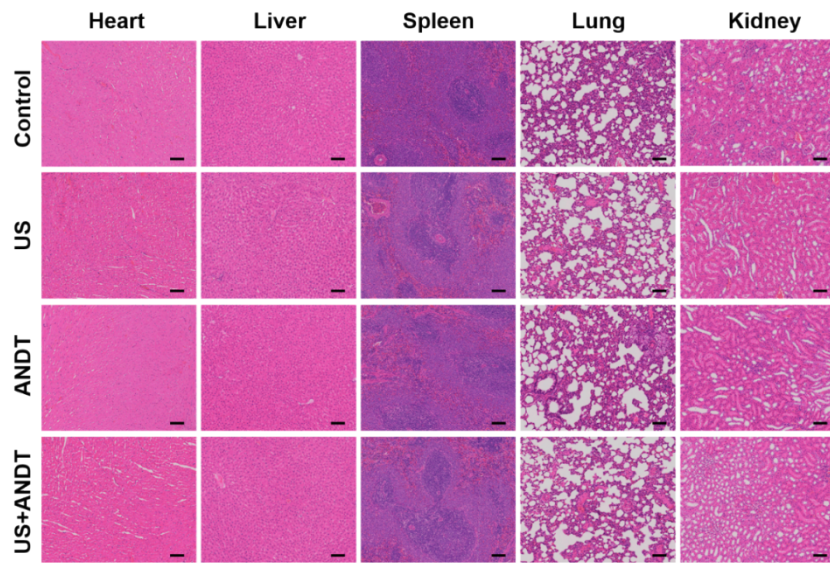

**Fig. S11** HE staining of heart, liver, spleen, lung, and kidney in different groups (scale bars = 100  $\mu$ m).

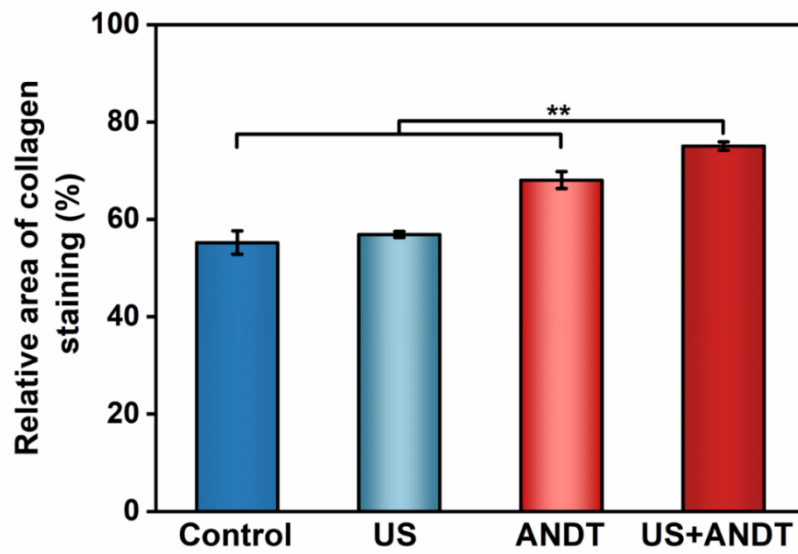

**Fig. S12** Quantitative analysis of collagen density ( $n = 3$ ,  $**p < 0.01$ ).
